# Supplementary material for: White Blood Cell, Neutrophil, and Lymphocyte Counts in Individuals in the Evacuation Zone Designated by the Government After the Fukushima Daiichi Nuclear Power Plant accident: The Fukushima Health Management Survey
Source: PubMed Central journal article supplement (PMC4275442; doi:10.2188/jea.je20140092), 2015-01-05
Supplement: je-25-080-s001.pdf [file je-25-080-s001.pdf]

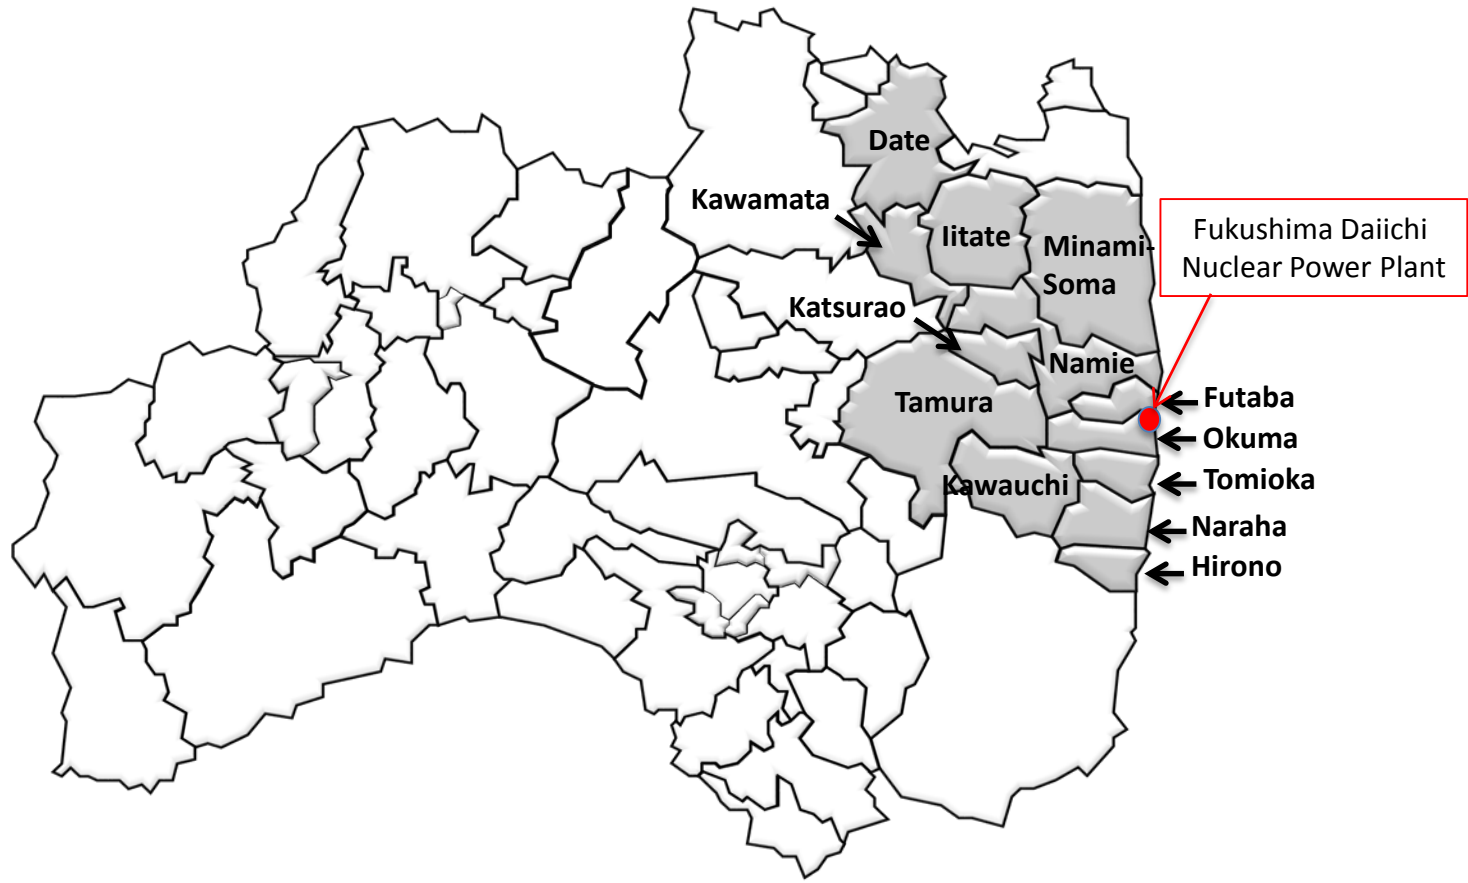

eFigure 1. Locations of the 13 evacuated localities in the map of Fukushima prefecture
