# Supplementary material for: White Blood Cell, Neutrophil, and Lymphocyte Counts in Individuals in the Evacuation Zone Designated by the Government After the Fukushima Daiichi Nuclear Power Plant accident: The Fukushima Health Management Survey
Source: PubMed Central journal article supplement (PMC4275442; doi:10.2188/jea.je20140092), 2015-01-05
Supplement: je-25-080-s003.pdf [file je-25-080-s003.pdf]

eTable 1. Items included in the comprehensive health check

| Age, years | Items                                                                                                             |
|------------|-------------------------------------------------------------------------------------------------------------------|
| 0-6        | Height, Weight, Blood cell count (RBC, Hb, Ht, Platelet, WBC, WBC subpopulations)                                 |
|            | Height, Weight, Blood cell count (RBC, Hb, Ht, Platelet, WBC, WBC subpopulations)                                 |
| 7-15       | If requested by patient: Blood chemistry (AST, ALT, $\gamma$ -GTP, TG, HDL-C, LDL-C, HbA1c, FBG, S-Cr, eGFR, UA)  |
|            | Height, Weight, Abdominal circumference/BMI, BP, Blood cell count (RBC, Hb, Ht, Platelet, WBC, WBC subpopulation) |
| $\geq 16$  | Blood chemistry (AST, ALT, $\gamma$ -GTP, TG, HDL-C, LDL-C, HbA1c, FBS, S-Cr, eGFR, UA)                           |
|            | Urinary testing (protein, sugar, blood)                                                                           |

ALT, alanine aminotransferase; AST, aspartate aminotransferase; BMI, body mass index; BP, blood pressure; eGFR, estimated glomerular filtration rate; FBG, fasting blood glucose;  $\gamma$ -GTP,  $\gamma$ -glutamyl transpeptidase; Hb, hemoglobin; HbA1c, hemoglobin A1c; Hct, hematocrit; HDL-C, high-density lipoprotein-cholesterol; LDL-C, low-density lipoprotein-cholesterol; RBC, red blood cell; S-Cr, serum creatinine; TG, triglyceride; UA, uric acid; WBC, white blood cell.
